# Supplementary material
Source: Preprints.org preprint supplement (doi:10.20944/preprints201910.0045.v1)
Supplement: Supplementary file 2 [file TableS1.xlsx]

## Sheet: Sheet 1
Table S1. DNA Quantity
	Genomic DNA		Circulating free DNA
Patient	DNA concentration (ng/ul)	Total DNA for WES (ng)	DNA concentration (ng/ul)	Total DNA for WES (ng)
1	111.3	1782	32.7	917
2	98.9	1582	1.2	39
3	63.8	1085	7.1	206
4	40.9	1187	12	385
5	55.4	1162	13.1	394
6	44.7	3757	10.5	285
7	56.2	1405	2.1	66
8	83.1	1413	2.7	105
9	49.2	1231	2.9	91
10	25.5	1249	2.5	74
