# Supplementary material
Source: Preprints.org preprint supplement (doi:10.20944/preprints201910.0045.v1)
Supplement: Supplementary file 4 [file TableS3.xlsx]

## Sheet: Sheet 1
Table S3. Driver Melanoma Mutations
Patient	Driver Mutation	gDNA WES MAF (%)	cfDNA WES MAF (%)	cfDNA ddPCR MAF (%)
1	BRAF V600E	52	34	40
2	BRAF V600E	25	12 (25)#	8
3	BRAF V600E	59	30	42
4	BRAF V600E	40	7 (28)#	7
5	BRAF V600K	83	45	54*
6	BRAF G466E	31	38	28
7	NRAS Q61K	51	47	39
8	NRAS Q61K	62	7 (41)#	29
9	NRAS Q61R	31	21	13
10	NRAS Q61R	57	7 (42)#	10
#Manually curated as below set WES MAF threshold of 20%, total reads in brackets
*Based on NGS lung oncomine cfDNA assay
Circulating cell-free (cf) DNA; Genomic (g) DNA; MAF, mutant allele frequency
