# Supplementary material
Source: Preprints.org preprint supplement (doi:10.20944/preprints201910.0045.v1)
Supplement: Supplementary file 5 [file TableS4.xlsx]

## Sheet: Sheet 1
Table S4. Highlighted Mutations
Patient	Mutation	gDNA WES MAF (%)	cfDNA WES MAF (%)
1	CSMD3 D285N NRAS Q22K* PLCB4 R308C RAI2 P275L	21 42 44 100 (8)#	16 (141)# 43 59 60
2	FAT4 S3825F	27	17 (44)#
3	CDK4 R24C NLRP2 M942I PAPPA D961N	33 5 (19)# 16 (90)#	35 31 24
4	ND
5	ND
6	ARMC4 E323K CARD11 CHL1 P880S CORIN D607N CYLC2 E266K EXPH5 P658S G6PC R149W H2BFWT R64Q LRRC18 E145K LRRN1 D708N MASP2 R356W MAST3 R1071W MRGPRX2 G47E OR10J3 S6F PAPPA2 R57Q PI15 P152S PTPRD E406K SLC26A3 R566Q ST18 E147K STK31 E738K TRPC6 D205N ZNF536 S929F	18 (34)# 24 9 (124)# 12 (144)# 9 (75)# 18 (138)# 7 (41)# 9 (43# 3 (88)# 38 ND (35)# 11 (9)# 19 (52)# 9 (103)# 12 (86)# 12 (133)# 16 (235)# 21 14 (115)# 18 (268)# 16 (49)# 16 (115)#	24 26 23 21 33 21 35 38 25 51 37 27 31 27 24 20 25 25 22 32 26 21
7	PCLO E3863K	22	23
8	ND
9	ND
10	MAP3K5 R256C	36	3 (79)#
*May convey BRAF/MEK inhibitor resistance
#Manually curated as below set WES MAF threshold of 20%, reads in brackets
Circulating cell-free (cf) DNA; Genomic (g) DNA; MAF, mutant allele frequency; ND, not detected
